# Supplementary material for: Multilocus Phylogeography of the Tuber mesentericum Complex Unearths Three Highly Divergent Cryptic Species
Source: MDPI journal article supplement (doi:10.3390/jof7121090), 2021-12-17
Supplement: s1 [file s1]

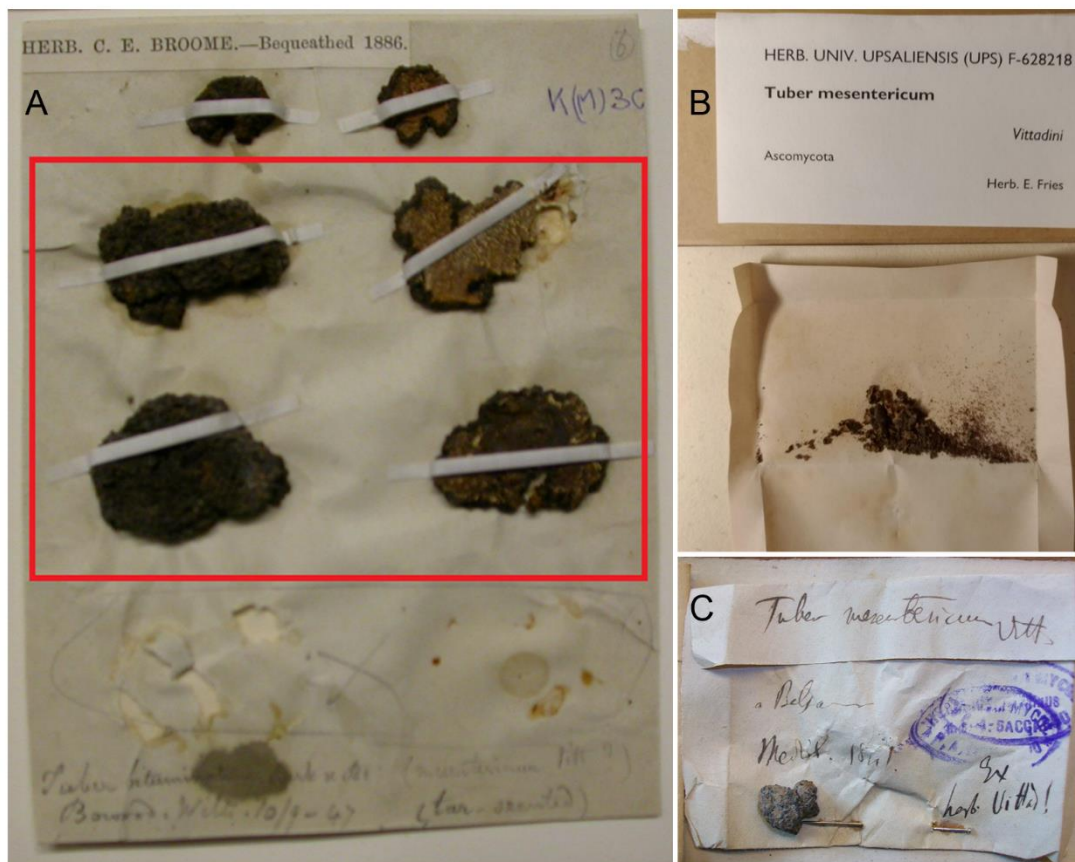

**Figure S1.** Historical voucher specimens from Kew (A), Uppsala (B) and Padua (C) herbaria.

## Forward primers

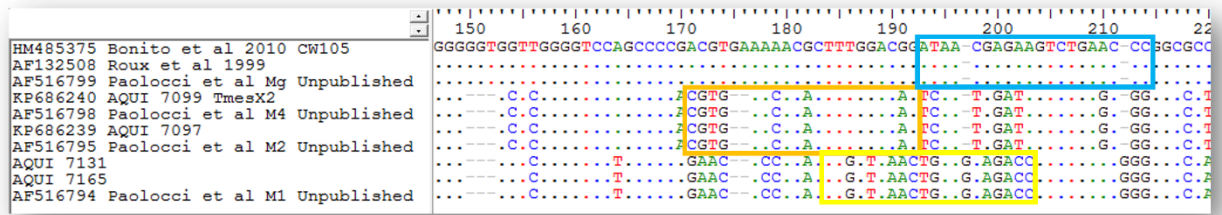

## Reverse primers

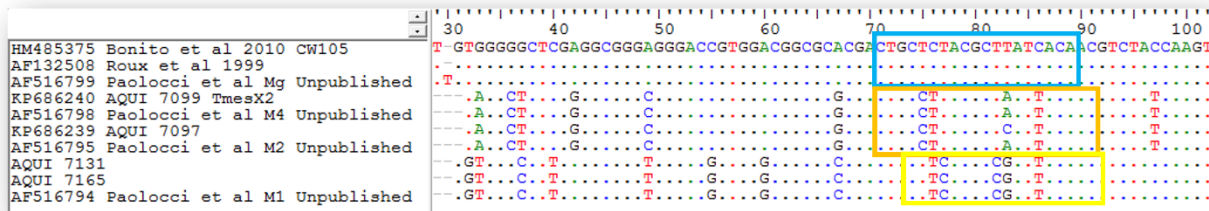

**Figure S2.** Localization of the three *T. mesentericum* clade-specific primer pairs on the ITS region alignment

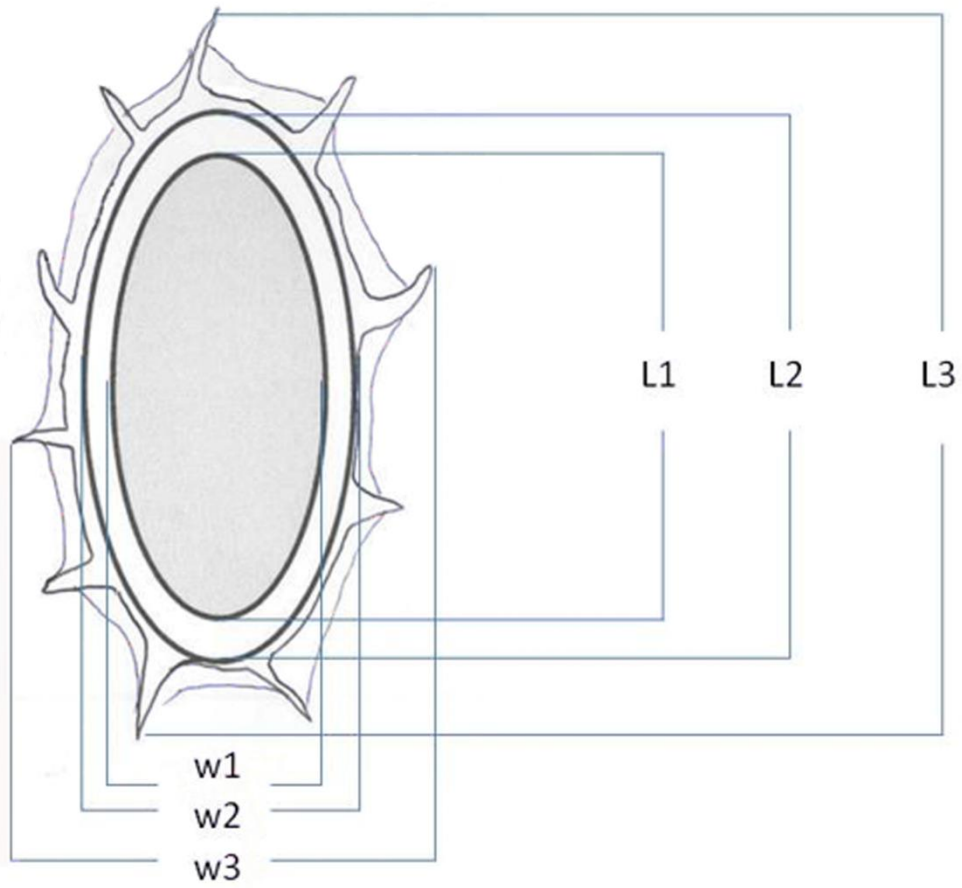

**Figure S3.** Graphic representation of spore parameters measured in this study.

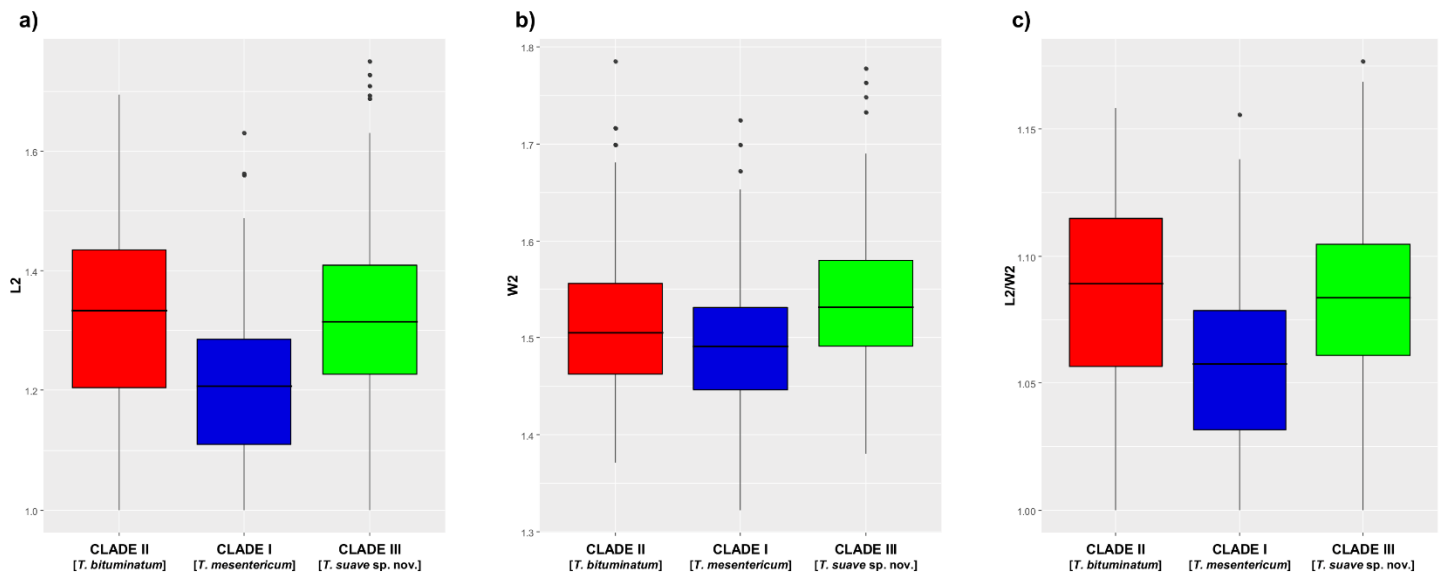

**Figure S4.** Boxplots of sporadic dimensions (A, L2-length; B, W2-width; C, L2/W2 ratio) in the three clades.
