# Supplementary material for: Multilocus Phylogeography of the Tuber mesentericum Complex Unearths Three Highly Divergent Cryptic Species
Source: MDPI journal article supplement (doi:10.3390/jof7121090), 2021-12-17
Supplement: s1 [file s1]

**Table S2.** Results of one-way ANOVA with repeated measure for differences in spore size (L2, W2 and L2/W2; log-transformed data) among the three cryptic lineages.

| Parameters |                     | Sum of Squares | df  | F    | <i>p</i> |
|------------|---------------------|----------------|-----|------|----------|
| L2         | Species             | 1.424          | 2   | 3.86 | 0.051    |
|            | Residuals (between) | 2.216          | 12  |      |          |
|            | Residuals (within)  | 8.512          | 478 |      |          |
| W2         | Species             | 0.208          | 2   | 2.88 | 0.095    |
|            | Residuals (between) | 0.434          | 12  |      |          |
|            | Residuals (within)  | 2.233          | 478 |      |          |
| L2/W2      | Species             | 0.084          | 2   | 3.53 | 0.062    |
|            | Residuals (between) | 0.143          | 12  |      |          |
|            | Residuals (within)  | 0.498          | 478 |      |          |
